# Supplementary material for: Dibenzo[a,c]phenazine-derived near-infrared fluorescence biosensor for detection of lysophosphatidic acid based on aggregation-induced emission
Source: Royal Society of Chemistry journal article supplement (doi:10.1039/c5ra21408d), 2015-01-01
Supplement: c5ra21408d1.pdf [file c5ra21408d1.pdf]

## Supplementary Information

### **Dibenzo[a,c]phenazine-derived near-infrared fluorescence biosensor for detection of lysophosphatidic acid based on the aggregation-induced emission**

Tao Jiang, Niannian Lu, Ji Yang, Yandi Hang, Jian Wang, Ping Zhao\* and Jianli Hua\*

*Key Laboratory for Advanced Materials, Institute of Fine Chemicals, East China University of Science and Technology, 200237, Shanghai, China.*

#### **Contents list:**

##### **S1. Materials and Measurements**

##### **S2. Quantification of LPA in the fetal bovine serum (FBS)**

##### **S3. Fluorescence spectra of TDBP in DMSO/H<sub>2</sub>O mixtures.**

##### **S4. The fluorescence spectra of TDBP (100 $\mu$ M) to LPA (100 $\mu$ M) in the presence of various proteins and miscellaneous interference cations and anions (100 $\mu$ M). $\lambda_{\text{ex}}$ : 530 nm.**

##### **S5. Change in fluorescence ratio ( $F/F_{\text{LPA}}$ ) of TDBP (100 $\mu$ M) upon addition of 1 equiv. amounts of LPA in the presence of other interfere substrates (1 equiv.) in DMSO/H<sub>2</sub>O mixtures (1/1, v/v). $F/F_{\text{LPA}}$ represents the fluorescence intensity ratio of other interfere substrates (F) and LPA ( $F_{\text{LPA}}$ ). $\lambda_{\text{ex}}$ : 530 nm.**

##### **S6. Characterization**

##### **S7. References**

## S1. Materials and Measurements

*N,N*-dimethylformamide (DMF) was refluxed with calcium hydride and distilled before use. Tetrahydrofuran (THF) was pre-dried over 4 Å molecular sieves and distilled under an N<sub>2</sub> atmosphere from sodium benzophenone ketyl immediately before use. 3, 6-dibromobenzene-1,2-diamine (compound **1**)<sup>1</sup> and (4-(bis(4-methoxyphenyl)amino)phenyl)boronic acid<sup>2</sup> were prepared according to the previous published literatures. All others chemicals were purchased from commercial sources and used without further purification. Lysophosphatidic acid (LPA) was purchased from the aladdin. The solutions for analytical studies were prepared with deionized water treated with a Milli-Q System (Billerica, MA, USA).

<sup>1</sup>H NMR and <sup>13</sup>C NMR spectra were recorded on a Bruker AM 400MHz spectrometer with tetramethyl silane (TMS) as the internal reference. Electrospray ionization and time-of-flight analyzer (ESI-TOF) mass spectra were carried out on a Waters Micromass LCT mass spectrometer. Absorption spectra were measured with a Varian Cary 500 UV-Vis spectrophotometer. Fluorescence spectra were measured with a Horiba scientific FluoroMax-4 spectrofluorometer. The SEM micrographs were recorded with a JEOL JSM-6360 scanning electron microscope (SEM). Zeta potentials were recorded on Zeta-size 3000 HS.

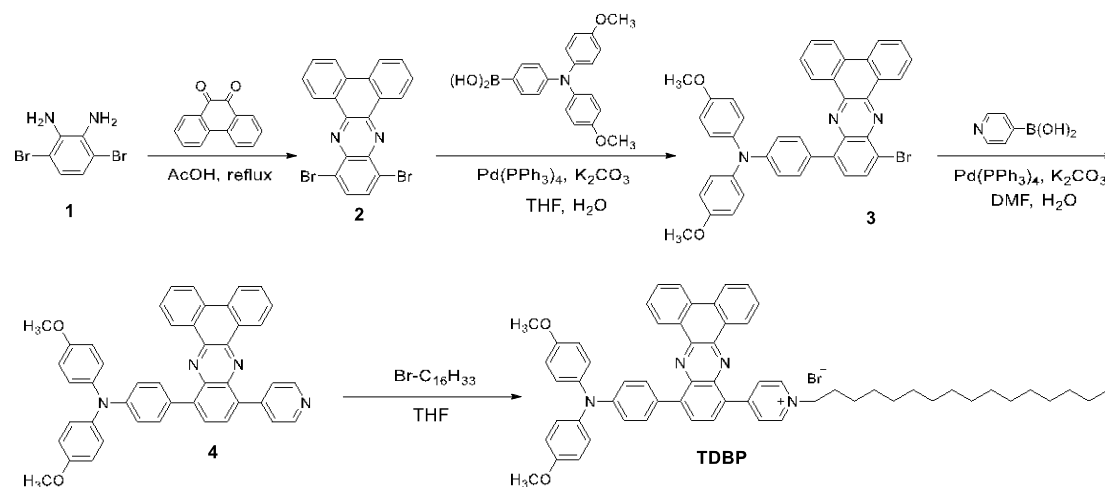

**Scheme S1.** Synthetic route of the compound **TDBP**.

**Synthesis of 2.** In a 100 mL two-necked round-bottom flask, compound **1** (2.26 g, 8.5 mmol) and phenanthrene-9,10-dione (1.76 g, 8.5 mmol) were dissolved in 25 mL acetic acid under N<sub>2</sub> atmosphere and refluxed for 12 h. Upon cooling, the mixture solution was concentrated using a rotary evaporator and the obtained product was washed by the DCM for three times to afford the pure compound **2** (2.41 g, 65%). <sup>1</sup>H NMR (CDCl<sub>3</sub>, 400 MHz, TMS), δ: 9.48 (d, *J* = 9.0 Hz, 2H), 8.58 (d, *J* = 8.0 Hz, 2H), 8.03 (s, 2H), 7.85 (t, *J* = 8.2 Hz, 2H), 7.79 (t, *J* = 7.2 Hz, 2H).

**Synthesis of 3.** In a 50 mL two-necked round-bottom flask, compound **2** (435.9 mg, 1 mmol) and Pd(PPh<sub>3</sub>)<sub>4</sub> (30.0 mg, 0.026 mmol) were dissolved in 15 mL THF under N<sub>2</sub> atmosphere, and then added 5 mL 2 M potassium carbonate aqueous solution to the mixture. After stirring for 30 min at 50 °C, (4-(bis(4-methoxyphenyl)amino)phenyl)boronic acid (433.2 mg, 1 mmol) dissolved in 10 mL THF was dropwise added into the mixture and stirred for another 5 h. Upon cooling, the mixture was poured into saturated brine and extracted with DCM (50 mL × 3). The combined organic layer was dried over anhydrous MgSO<sub>4</sub> and concentrated using a rotary evaporator. The residue was purified by column chromatography on silica (PE/DCM = 4/1–2/1, v/v) to afford the product as a yellow solid (211.6 mg, 32%). <sup>1</sup>H NMR (CDCl<sub>3</sub>, 400 MHz, TMS), δ: 9.53 (d, *J* = 7.5 Hz, 1H), 9.14 (d, *J* = 8.4 Hz, 1H), 8.57 (s, 2H), 8.21 (s, 1H), 7.86 – 7.64 (m, 7H), 7.22 (d, *J* = 8.9 Hz, 4H), 7.15 (d, *J* = 8.6 Hz, 2H), 6.91 (d, *J* = 8.9 Hz, 4H), 3.84 (s, 6H). <sup>13</sup>C NMR (CDCl<sub>3</sub>, 100 MHz, TMS), δ: 156.06, 148.57, 142.07, 141.96, 140.82, 140.44, 140.13, 139.67, 132.94, 132.24, 132.20, 131.75, 130.62, 130.38, 130.05, 129.93, 129.59, 128.96, 128.06, 127.98, 126.93, 126.80, 122.85, 122.81, 122.45, 119.57, 114.77, 55.55. HRMS (ESI) (*m/z*): [(M+H)<sup>+</sup>] calcd for C<sub>40</sub>H<sub>28</sub>BrN<sub>3</sub>O<sub>2</sub>, 662.1443, found: 662.1438.

**Synthesis of 4.** In a 50 mL two-necked round-bottom flask, compound **3** (99.2 mg, 0.15 mmol) and Pd(PPh<sub>3</sub>)<sub>4</sub> (30.0 mg, 0.026 mmol) were dissolved in 20 mL DMF under N<sub>2</sub> atmosphere, and then added 5 mL 2 M potassium carbonate aqueous solution to the mixture. After stirring for 30 min at 60 °C, pyridin-4-ylboronic acid (61.5 mg, 0.5 mmol) dissolved in 5 mL H<sub>2</sub>O was dropwise added into the mixture and refluxed for another 10 h. Upon cooling, the mixture was poured into saturated brine and extracted with DCM (50 mL × 3). The combined organic layer was washed five times by the water and then dried over anhydrous MgSO<sub>4</sub> and concentrated using a rotary evaporator. The residue was purified by column chromatography on silica (DCM/Ethanol = 40/1–20/1, v/v) to afford the product as a red solid (67.4 mg, 68%). <sup>1</sup>H NMR (CDCl<sub>3</sub>, 400 MHz, TMS), δ: 9.17 (d, *J* = 8.0 Hz, 1H), 9.08 (d, *J* = 9.2 Hz, 1H), 8.85 (d, *J* = 6.0 Hz, 2H), 8.56 (d, *J* = 8.0 Hz, 2H), 8.00 (s, 2H), 7.92 (d, *J* = 6.0 Hz, 2H), 7.86 (d, *J* = 8.7 Hz, 2H), 7.79 (t, *J* = 8.2 Hz, 2H), 7.70 (t, *J* = 7.8 Hz, 2H), 7.24 (d, *J* = 9.0 Hz, 4H), 7.18 (d, *J* = 8.7 Hz, 2H), 6.92 (d, *J* = 9.0 Hz, 4H), 3.84 (s, 6H). <sup>13</sup>C NMR (CDCl<sub>3</sub>, 100 MHz, TMS), δ: 156.10, 149.25, 148.65, 146.80, 141.46, 141.38, 141.10, 140.79, 139.87, 139.64, 135.74, 132.22, 132.15, 132.12, 132.05, 131.87, 130.36, 130.26, 130.19, 130.04, 129.82, 128.59, 128.47, 128.04, 127.99, 127.00, 126.59, 126.39, 125.91, 122.86, 119.44, 114.80, 55.55. HRMS (ESI) (*m/z*): [(M+H)<sup>+</sup>] calcd for C<sub>45</sub>H<sub>32</sub>N<sub>4</sub>O<sub>2</sub>, 661.2604, found: 661.2600.

**Synthesis of TDBP.** In a 50 mL two-necked round-bottom flask, compound **7** (330.1 mg, 0.5 mmol) and 1-bromohexadecane (456.3 mg, 1.5 mmol) were dissolved in 20 mL THF under N<sub>2</sub> atmosphere and then stirred at 70 °C for 72 hours. Upon cooling, the mixture was poured into saturated brine and extracted with DCM (30 mL × 3). The combined organic layer was dried over anhydrous MgSO<sub>4</sub> and concentrated using a rotary evaporator. The residue was purified by column chromatography on silica (DCM/Ethanol = 10/1, v/v) to afford the product as a purple solid (106.1 mg, 22%). <sup>1</sup>H NMR (CDCl<sub>3</sub>, 400 MHz, TMS), δ: 9.57 (d, *J* = 5.5 Hz, 2H), 8.60 (d, *J* = 8.0 Hz, 1H), 8.52 (d, *J* = 5.5 Hz, 2H), 8.43 (d, *J* = 8.2 Hz, 1H), 8.09 – 7.91 (m, 3H), 7.64 (dd, *J* = 16.8, 7.5 Hz, 3H), 7.52 – 7.36 (m, 4H), 7.12 (d, *J* = 8.9 Hz, 4H), 6.98 (d, *J* = 8.6 Hz, 2H), 6.87 (d, *J* = 9.0 Hz, 4H), 5.14 (*J* = 4.8 Hz, 2H), 3.83 (s, 6H), 2.16 – 2.04 (m, 2H), 1.28 – 1.15 (m, 26H), 0.85 (t, *J* = 7.1 Hz, 3H). <sup>13</sup>C NMR (CDCl<sub>3</sub>, 100 MHz, TMS), δ: 155.10, 152.28, 147.57, 143.03, 142.16, 139.55, 139.29, 137.22, 136.92, 130.76, 130.52, 130.16, 128.09, 127.83, 127.62, 127.33, 127.10, 126.02, 121.09, 117.32, 113.74, 54.48, 45.00, 31.30, 30.89, 28.70, 28.64, 28.56, 28.34, 25.30, 21.66, 13.11, 7.68. HRMS (ESI) (*m/z*): [(M-Br)<sup>+</sup>] calcd for C<sub>61</sub>H<sub>65</sub>N<sub>4</sub>O<sub>2</sub>, 885.5102, found: 885.5103.

## **S2. Quantification of LPA in the fetal bovine serum (FBS)**

For the quantification measurements, a stock solution (1 × 10<sup>-3</sup> M) of probe **TDBP** was prepared by dissolving 4.82 mg of **TDBP** into 5 mL of DMSO. A stock solution (1 × 10<sup>-3</sup> M) of LPA was dissolved in the pure HEPES buffer solution and fetal bovine serum solution for the spiked and recovered concentration of LPA, respectively. All the measurements were conducted in the DMSO/water (1/1, v/v) solution at the concentration of 100 μM of **TDBP**. Fetal bovine serum was added saturated ammonium sulfate to remove protein by salting out effect and centrifugal operation prior to use.

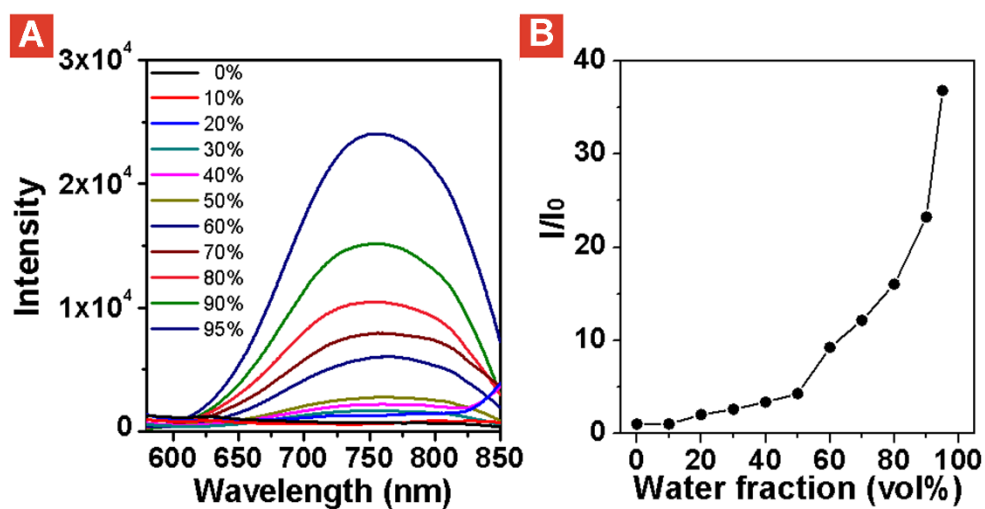

Fig. S1 (A) Fluorescence emission spectra of **TDBP** in DMSO and DMSO/water mixtures with different water fractions ( $f_w$ ). (B) Plots of relative emission intensity ( $I/I_0$ ) versus the composition of the DMSO/water mixtures of **TDBP**;  $I_0$  = emission intensity in pure DMSO solution. Solution concentration:  $1 \times 10^{-4}$  M;  $\lambda_{ex}$ : 530 nm.

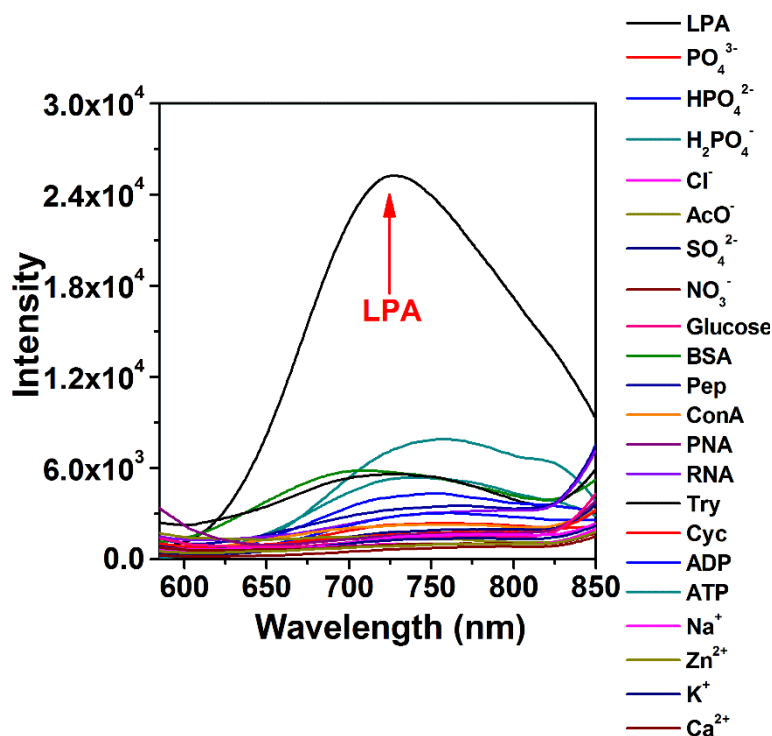

Fig. S2. The fluorescence spectra of **TDBP** (100  $\mu$ M) to LPA (100  $\mu$ M) in the presence of various proteins and miscellaneous interference cations and anions (100  $\mu$ M),  $\lambda_{ex}$ : 530 nm.

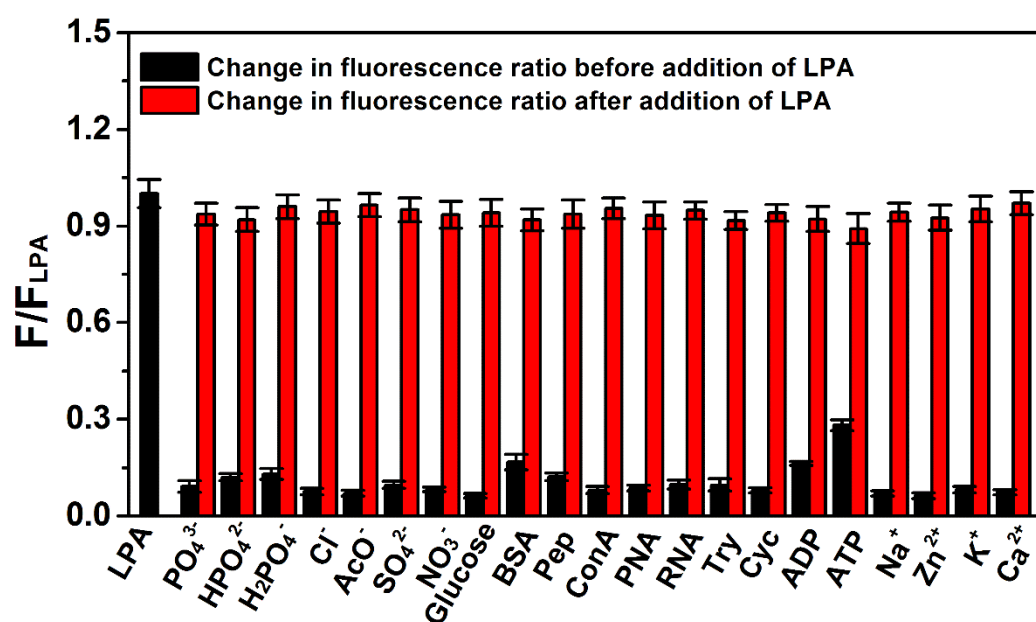

**Fig. S3** Change in fluorescence ratio ( $F/F_{LPA}$ ) of **TDBP** (100  $\mu$ M) upon addition of 1 equiv. amounts of LPA in the presence of other interfere substrates (1 equiv.) in DMSO/H<sub>2</sub>O mixtures (1/1, v/v).  $F/F_{LPA}$  represents the fluorescence intensity ratio of other interfere substrates ( $F$ ) and LPA ( $F_{LPA}$ ),  $\lambda_{ex}$ : 530 nm.

## S6. Characterization

### <sup>1</sup>H NMR of compound 2

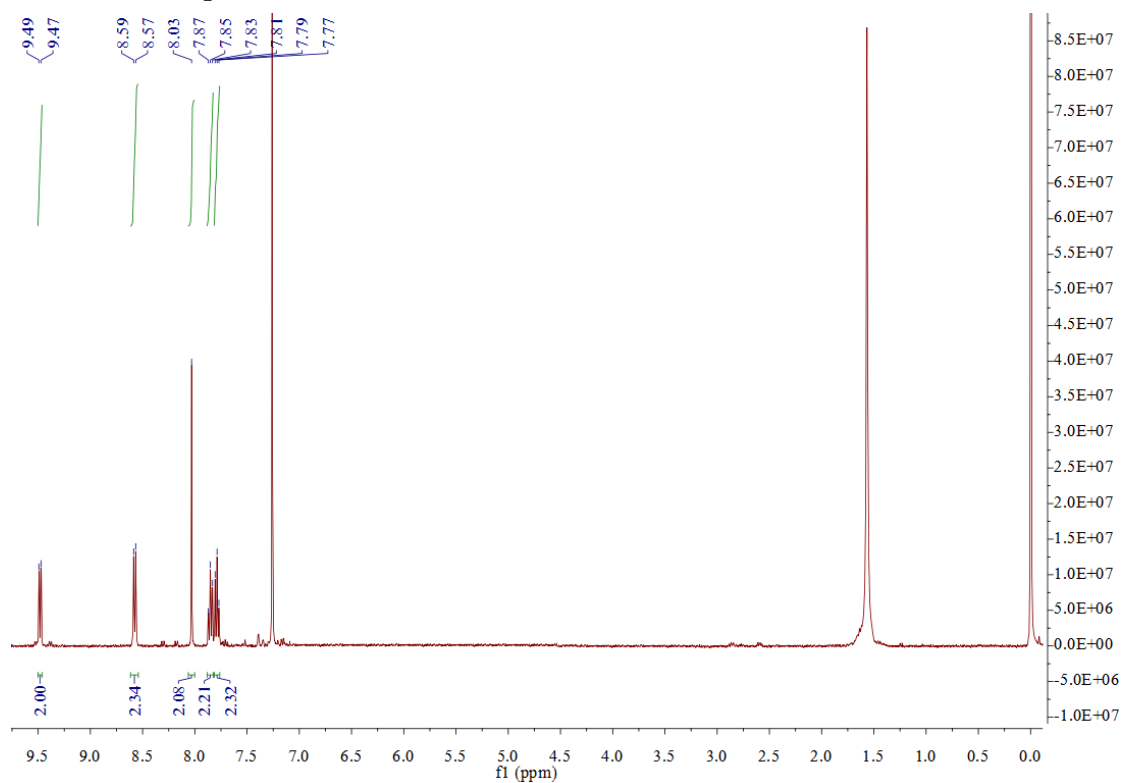

### <sup>1</sup>H NMR of compound 3

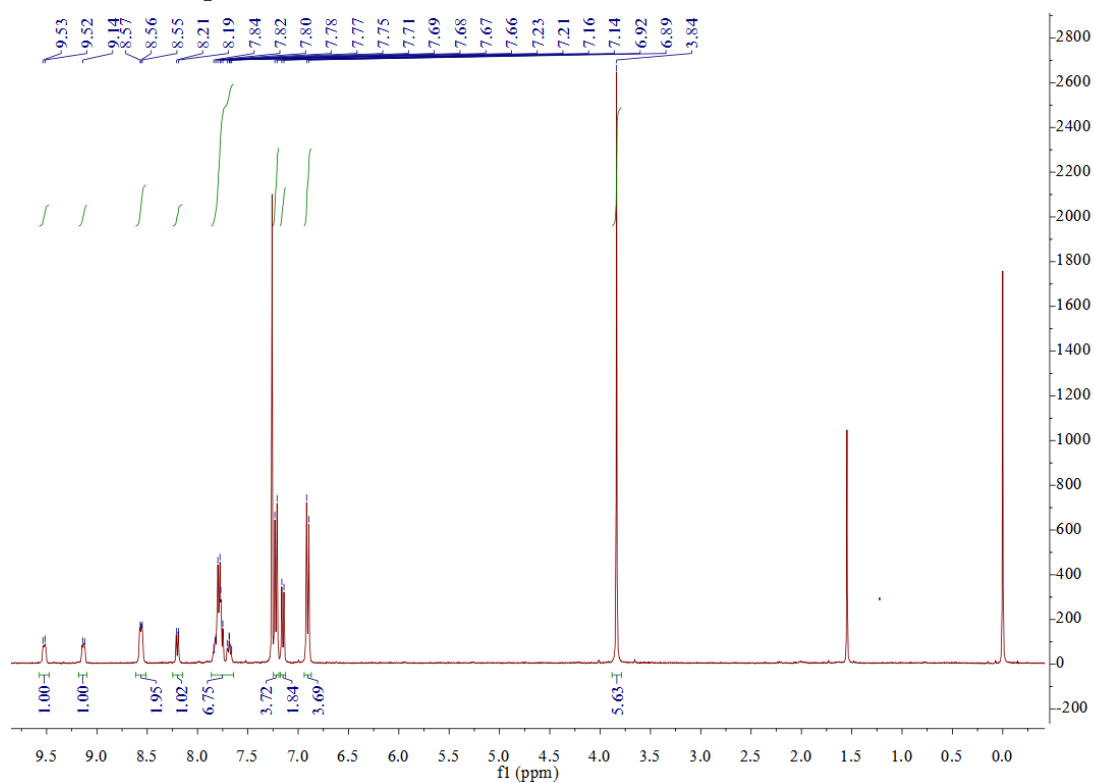

### <sup>13</sup>C NMR of compound 3

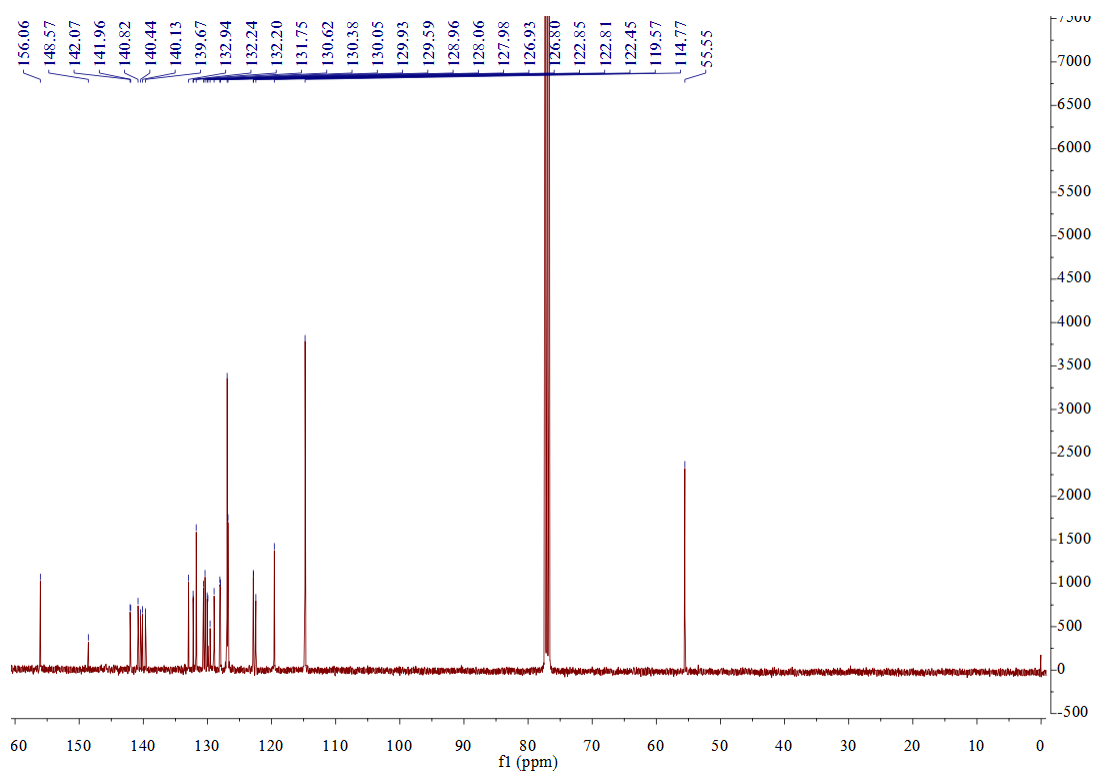

### High-Res ESI-TOF mass spectrum of compound 3

#### Elemental Composition Report

Page 1

#### Single Mass Analysis

Tolerance = 50.0 PPM / DBE: min = -1.5, max = 100.0

Element prediction: Off

Number of isotope peaks used for i-FIT = 2

Monoisotopic Mass, Even Electron Ions

43 formula(e) evaluated with 1 results within limits (up to 1 closest results for each mass)

Elements Used:

C: 0-40 H: 0-100 N: 0-3 O: 0-2 Br: 0-1

JL-HUA

ECUST Institute of Fine Chem

HL-JT-301 91 (0.649) Cm (88:91)

23-Jun-2015

19:58:48

1: TOF MS ES+  
2.29e+003

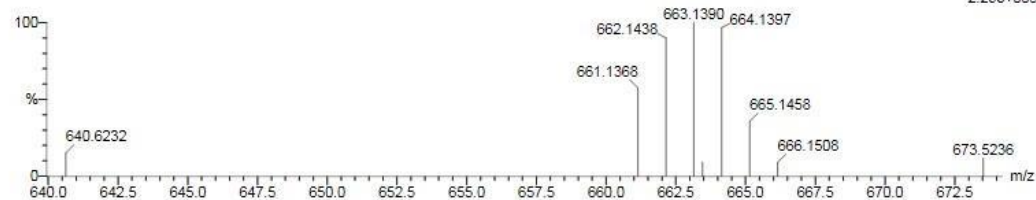

Minimum:

Maximum:

300.0

50.0

-1.5

100.0

Mass

Calc. Mass

mDa

PPM

DBE

i-FIT

i-FIT (Norm)

Formula

662.1438

662.1443

-0.5

-0.8

27.5

31.5

0.0

C40 H29 N3 O2 Br

### <sup>1</sup>H NMR of compound 4

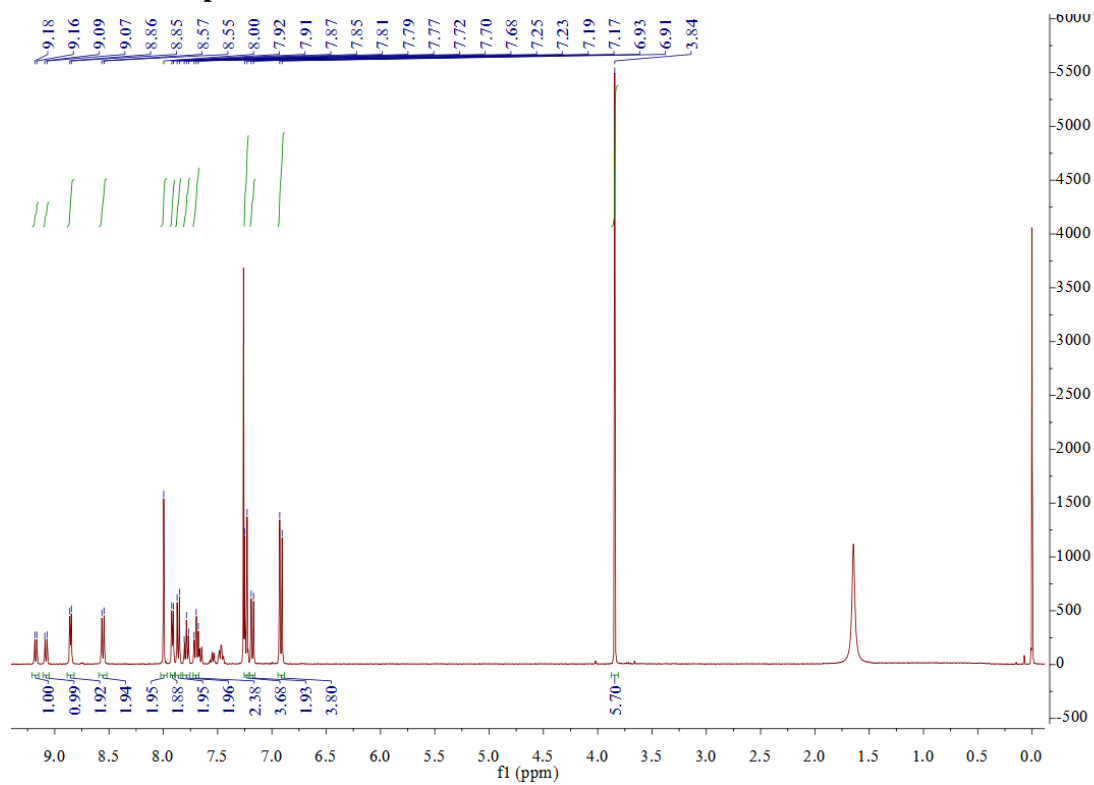

### <sup>13</sup>C NMR of compound 4

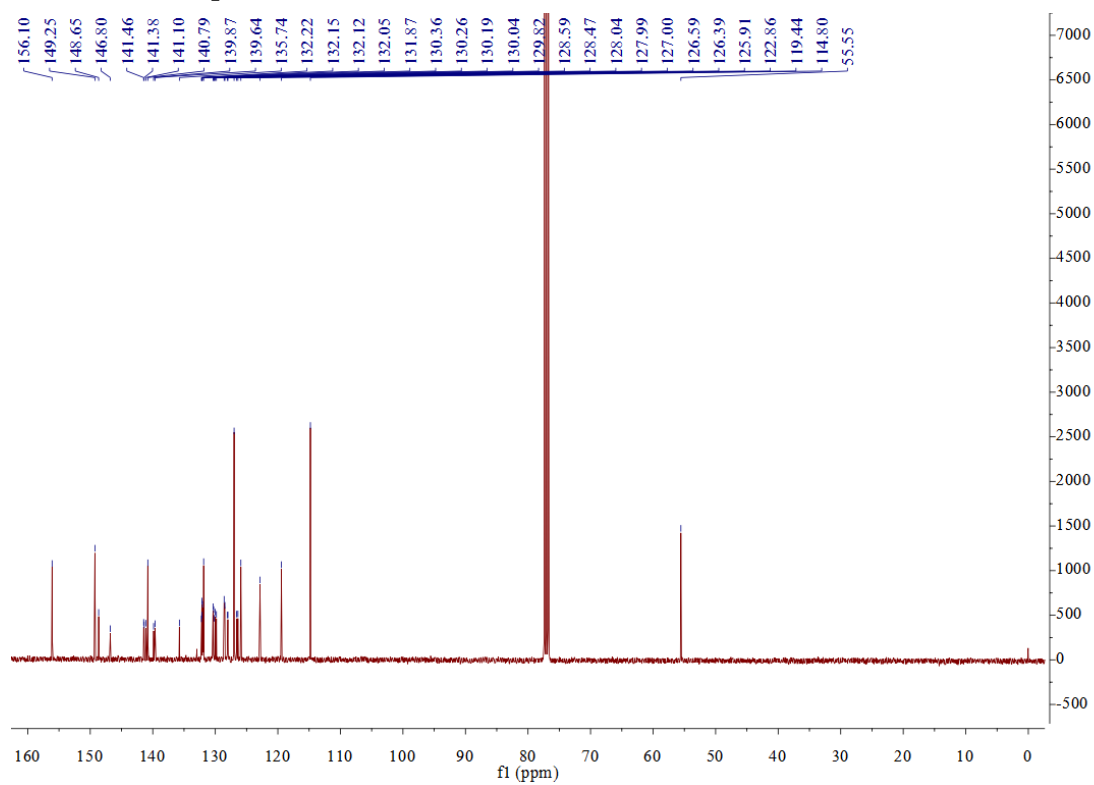

## High-Res ESI-TOF mass spectrum of compound 4

### Elemental Composition Report

Page 1

#### Single Mass Analysis

Tolerance = 50.0 PPM / DBE: min = -1.5, max = 100.0

Element prediction: Off

Number of isotope peaks used for i-FIT = 2

Monoisotopic Mass, Even Electron Ions

85 formula(e) evaluated with 7 results within limits (up to 1 closest results for each mass)

Elements Used:

C: 0-61 H: 0-66 N: 0-4 O: 0-2

JL-HUA

ECUST institute of Fine Chem

HL-JT-302 27 (0.255) Cm (26.34)

23-Jun-2015

13:36:44

1: TOF MS ES+

3.07e+003

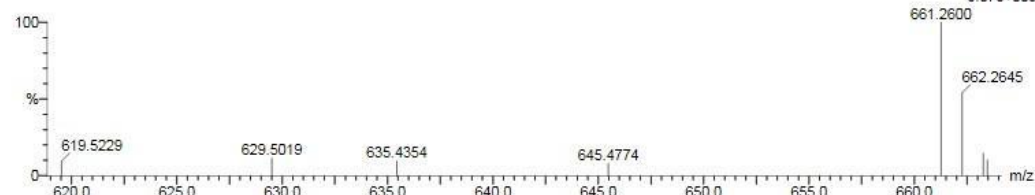

Minimum:

300.0

-1.5

Maximum:

50.0

100.0

| Mass     | Calc. Mass | mDa  | PPM  | DBE  | i-FIT | i-FIT (Norm) | Formula       |
|----------|------------|------|------|------|-------|--------------|---------------|
| 661.2600 | 661.2604   | -0.4 | -0.6 | 31.5 | 8.4   | 0.0          | C45 H33 N4 O2 |

## <sup>1</sup>H NMR of compound TDBP

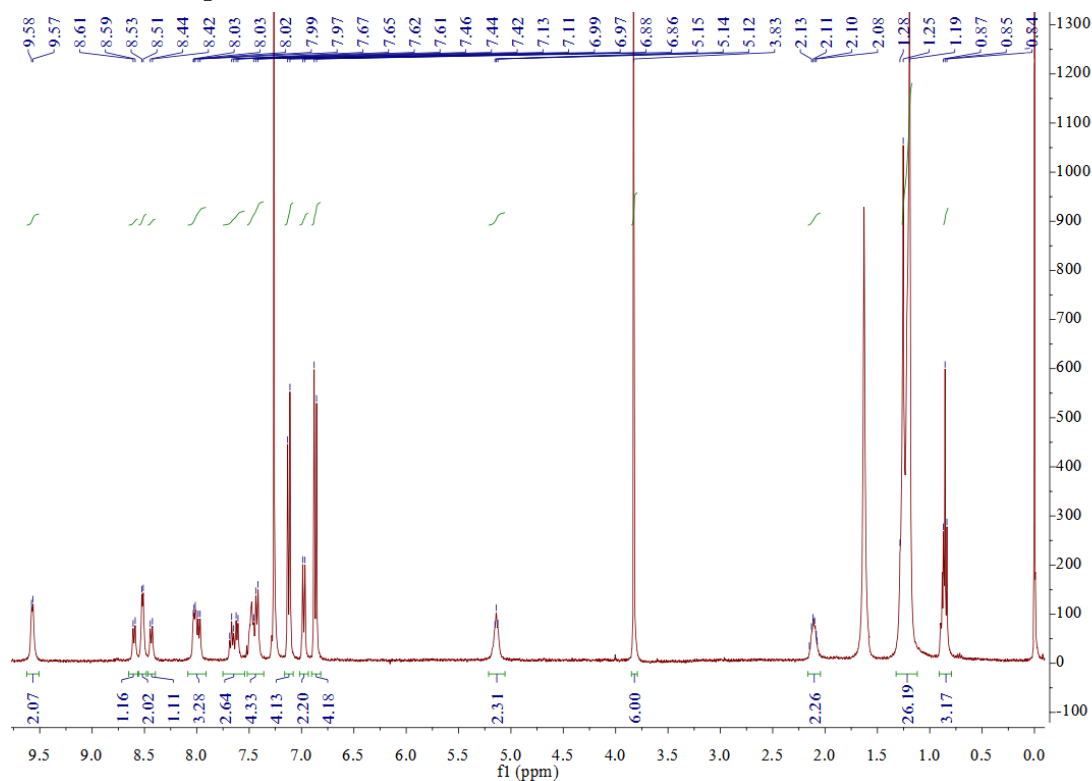

# **<sup>13</sup>C NMR of compound TDBP**

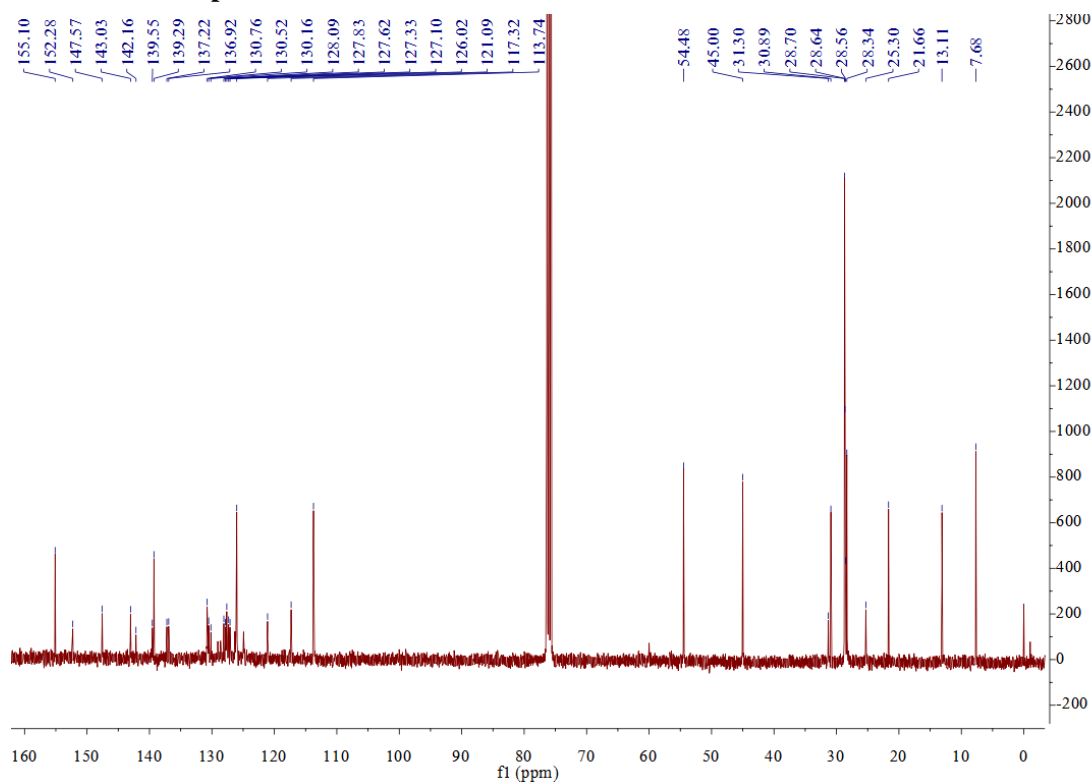

## **High-Res ESI-TOF mass spectrum of compound TDBP**

### **Elemental Composition Report**

Page 1

#### **Single Mass Analysis**

Tolerance = 50.0 PPM / DBE: min = -1.5, max = 100.0

Element prediction: Off

Number of isotope peaks used for i-FIT = 2

Monoisotopic Mass, Even Electron Ions

4 formula(e) evaluated with 1 results within limits (up to 1 closest results for each mass)

Elements Used:

C: 0-61 H: 0-66 N: 0-4 O: 0-2

JL-HUA

ECUST Institute of Fine Chem

HL-JT-303 220 (1.464) Cm (220:225)

23-Jun-2015

13:15:12

1: TOF MS ES+

2.11e+003

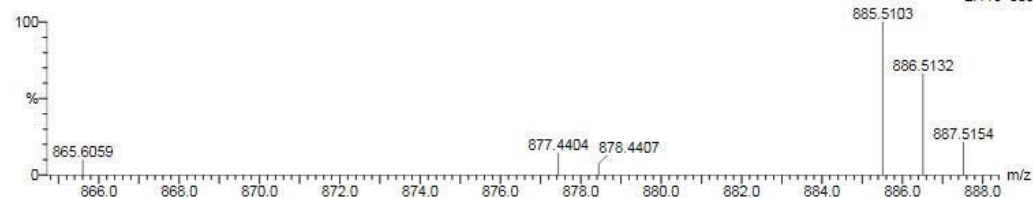

| Minimum: |            |       |      | -1.5  |       |              |         |           |
|----------|------------|-------|------|-------|-------|--------------|---------|-----------|
| Maximum: |            | 300.0 | 50.0 | 100.0 |       |              |         |           |
| Mass     | Calc. Mass | mDa   | PPM  | DBE   | i-FIT | i-FIT (Norm) | Formula |           |
| 885.5103 | 885.5102   | -0.5  | -0.6 | 31.5  | 9.3   | 0.0          | C61     | H65 N4 O2 |

## S7. References

1. H. N. Tsao, C. Yi, T. Moehl, J. H. Yum, S. M. Zakeeruddin, M. K. Nazeeruddin and M. Grätzel, *ChemSusChem*, 2011, **4**, 591.
2. Y. D. Hang, X. P. He, L. Yang and J. L. Hua, *Biosens. Bioelectron*, 2015, **65**, 420.
